# Supplementary material
Source: PubMed Central journal article supplement (PMC4402935)
Supplement: NIHMS669933-supplement-supplement_1.pdf [file NIHMS669933-supplement-supplement_1.pdf]

Table 1 (Supplement). Alignment of cleavage sites (P<sub>4</sub>P<sub>3</sub>P<sub>2</sub>P<sub>1</sub> | P<sub>1</sub>'P<sub>2</sub>'P<sub>3</sub>'P<sub>4</sub>') from fourteen BMP1 substrates. Using the DSPP cleavage site as a reference, homologies between DSPP and each are highlighted in green. The D residue at the P<sub>1</sub>' position is conserved in 14 substrates.

### BMP1 substrates

| Protein                        | P <sub>4</sub> | P <sub>3</sub> | P <sub>2</sub> | P <sub>1</sub> | P <sub>1</sub> ' | P <sub>2</sub> ' | P <sub>3</sub> ' | P <sub>4</sub> ' |
|--------------------------------|----------------|----------------|----------------|----------------|------------------|------------------|------------------|------------------|
| DSPP(7 species)                | S              | M              | Q              | G/RD           | D                | P                | N/K              |                  |
| Mouse/rat/bovine/human DMP1    | G              | M              | Q              | S              | D                | D                | P                | G/E              |
| Human prollysyl oxidase        | R              | M              | V              | G              | D                | D                | P                | Y                |
| Human chordin(C-terminal site) | P              | M              | Q              | A              | D                | G                | P                | R                |
| Human probiglycan              | F              | M              | M              | H              | D                | E                | E                | A                |
| Human prodecorin               | P              | M              | L              | E              | D                | E                | A                | S                |
| Mouse laminin 5Y2              | C              | Y              | S              | G              | D                | E                | N                | P                |
| Human chordin(N-terminal site) | R              | S              | Y              | S              | D                | R                | G                | E                |
| Pro $\alpha$ 1(III)            | P              | Y              | Y              | G              | D                | E                | P                | H                |
| Pro $\alpha$ 1(I)              | Y              | Y              | R              | A              | D                | D                | A                | N                |
| Pro $\alpha$ 2(I)              | F              | Y              | R              | A              | D                | Q                | P                | R                |
| Pro $\alpha$ 1(II)             | Y              | M              | R              | A              | D                | Q                | A                | A                |
| Pro $\alpha$ 2(V)              | E              | F              | T              | E              | D                | Q                | A                | A                |
| Pro $\alpha$ 1(VII)            | S              | Y              | A              | A              | D                | T                | A                | G                |

Table 2 (Supplement). Alignment of cleavage sites (P<sub>4</sub>P<sub>3</sub>P<sub>2</sub>P<sub>1</sub> | P<sub>1</sub>'P<sub>2</sub>'P<sub>3</sub>'P<sub>4</sub>') between DSPP and prollysyl oxidase. Using the DSPP cleavage site as a reference, homologies between DSPP and prollysyl oxidase are highlighted in green. Amino acid substitutions into the P<sub>2</sub> position of DSP-PP blocked DSP-PP cleavage.

### Proposed Consensus cleavage site between DSPP and prollysyl oxidase

|                    | P <sub>4</sub> | P <sub>3</sub> | P <sub>2</sub> | P <sub>1</sub> | P <sub>1</sub> ' | P <sub>2</sub> ' | P <sub>3</sub> ' | P <sub>4</sub> ' |                                  |
|--------------------|----------------|----------------|----------------|----------------|------------------|------------------|------------------|------------------|----------------------------------|
| DSPP               | S              | M              | Q              | G/RD           | D                | P                | N/K              |                  |                                  |
| hProllysyl oxidase | R              | M              | V              | G              | D                | D                | P                | Y                |                                  |
| consensus          | X              | M              | X              | G              | D                | D                | P                | Y                | Cleavage                         |
|                    |                |                | Q              |                |                  |                  |                  |                  | normal                           |
|                    |                |                | K              |                |                  |                  |                  |                  | No                               |
|                    |                |                | E              |                |                  |                  |                  |                  | No<br>(von Marschall et al 2010) |
